# Supplementary material for: Size effect of liposomes on centimeter-deep ultrasound-switchable fluorescence imaging and ultrasound-controlled release
Source: Royal Society of Chemistry journal article supplement (doi:10.1039/d2tb01343f), 2022-01-01
Supplement: d2tb01343f1.pdf [file d2tb01343f1.pdf]

## Supplementary

### **Size effect of liposomes on centimeter-deep ultrasound-switchable fluorescence imaging and ultrasound-controlled release**

*Yang Liu<sup>1,2,#</sup>, Tingfeng Yao<sup>1,2,#</sup>, Liqin Ren<sup>1,2</sup>, Baohong Yuan<sup>1,2,\*</sup>*

1. Department of Bioengineering, The University of Texas at Arlington, TX 76010, USA.

Joint Biomedical Engineering Program, The University of Texas at Arlington and  
University of Texas Southwestern Medical Center, Dallas, TX 75235, USA

2. Ultrasound and Optical Imaging Laboratory, Department of Bioengineering, The  
University of Texas at Arlington, Arlington, TX 76010, USA

#These authors contributed equally to this work.

\*Corresponding author's email: [baohong@uta.edu](mailto:baohong@uta.edu). (B. Yuan).

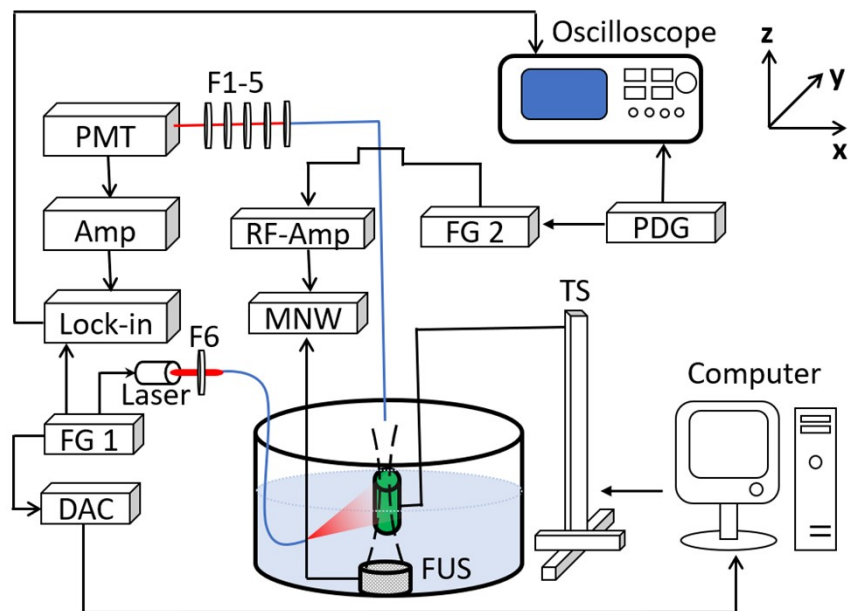

**Figure S1** Schematic diagram of USF imaging and release test setup. FUS: focused ultrasound; DAC: data acquisition card; FG 1: function generator 1; Amp: Amplifier; PMT: photomultiplier; F1-5: emission filters; RF-Amp: radio-frequency power amplifier; MNW: matching network; F6: excitation filter; FG 2: function generator 2; PDG: pulse delay generator; TS: 3-dimensional transition stage.

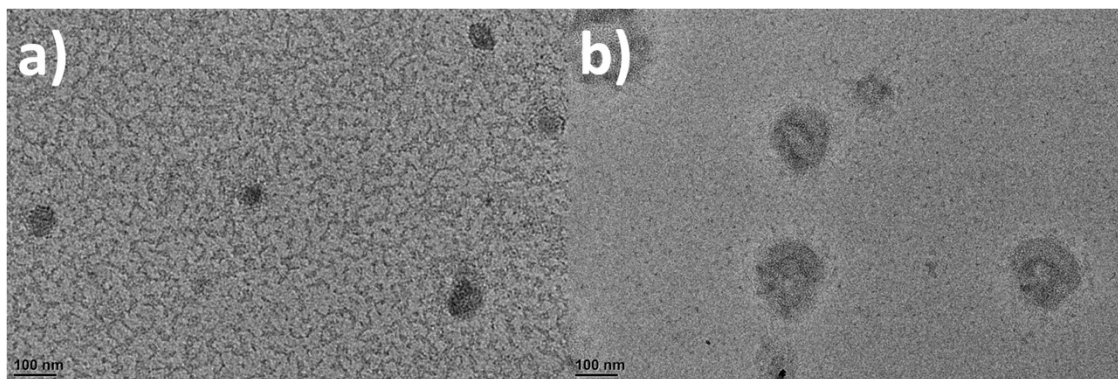

**Figure S2** TEM image of the a)30nm and b)200 nm filtered ICG-liposomes. The scale bar represents 100nm.

### TEM method

ICG-liposome solution of 8  $\mu\text{L}$  was dropped on a Formvar film (200 square mesh copper) and incubated for 2.5min before washed with 10  $\mu\text{L}$  of water for 3 times. 8  $\mu\text{L}$  of 2% uranyl acetate was then added on the film and dried in room temperature. The TEM (H-7500, Hitachi, Japan) image of the 30nm and 200nm filtered ICG-liposomes were taken using a voltage of 300kV. Acquired TEM images were shown in Figure S2.

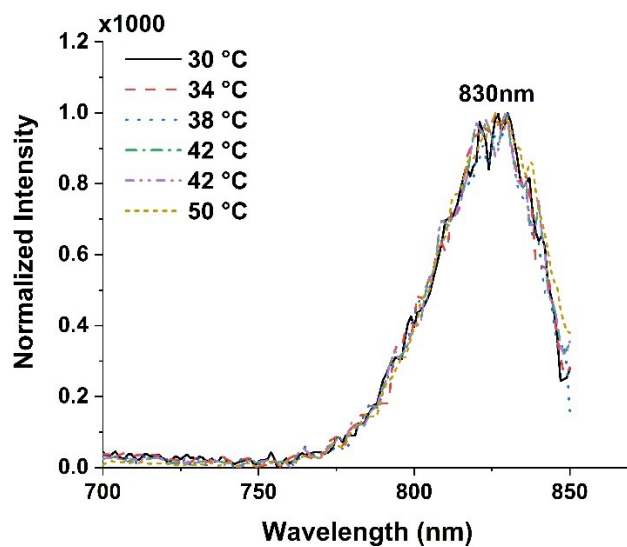

**Figure S3** Temperature effect on the emission spectrum of 200 nm filtered ICG-liposomes.

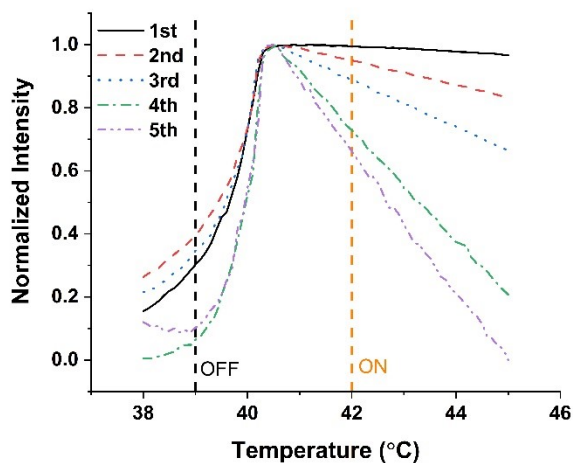

**Figure S4** Fluorescence intensity with respect to the change of temperature for 5 continuous cycles of switch on/off test. 200 nm filtered ICG-liposomes were considered stable within 3 cycles of on/off. After 3 cycles, the fluorescence intensity continuous to drop after fully switched on.
